# Supplementary material
Source: PubMed Central journal article supplement (PMC3904630)
Supplement: JCI72722sd.pdf [file JCI72722sd.pdf]

# **Otx2 loss arrests photoreceptor differentiation in CRX-associated dominant congenital blindness**

Jerome E. Roger<sup>1</sup>, Avinash Hiriyanna<sup>1</sup>, Norimoto Gotoh<sup>1</sup>, Hong Hao<sup>1</sup>, Debbie F. Cheng<sup>1</sup>, Rinki Ratnapriya<sup>1</sup>, Marie-Audrey Kautzmann<sup>1</sup>, Bo Chang<sup>2</sup> and Anand Swaroop<sup>1</sup>

## **Inventory**

Supplemental data: 6 figures and 3 Tables

Figure S1, related to Figure 2; Figure S2, related to Figure 5; Figures S3 and S4 related to Figure 6; Figure S5 and S6, related to Figure 7; Table 1, related to Figure 6

Supplemental experimental procedures

Supplemental references

## Supplemental Data

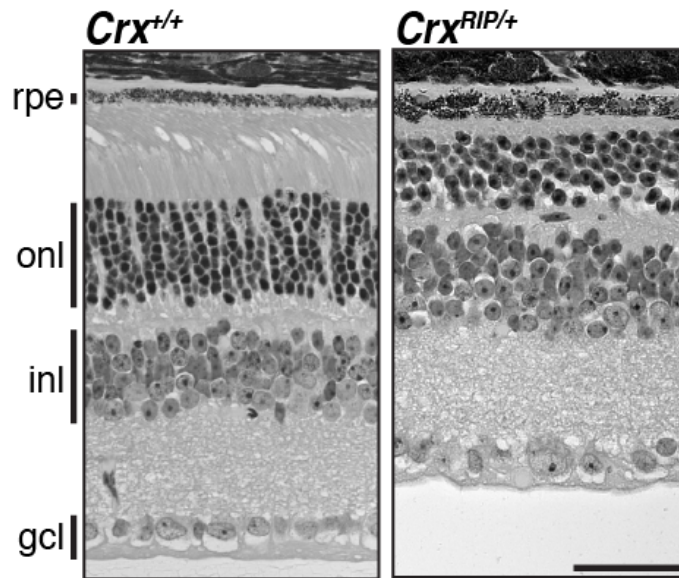

**Figure S1:**

**Long-term preservation of the outer nuclear layer in *Crx*<sup>RIP/+</sup> mutant retina.**

H&E staining of methacrylate sections of 18-month old WT and *Crx*<sup>RIP/+</sup> retina demonstrates that more than half of the photoreceptors are still present despite no visual function since birth. *Rpe*, retinal pigment epithelium; *onl*, outer nuclear layer; *inl*, inner nuclear layer; *gcl*, ganglion cell layer. Scale bar, 40  $\mu$ m.

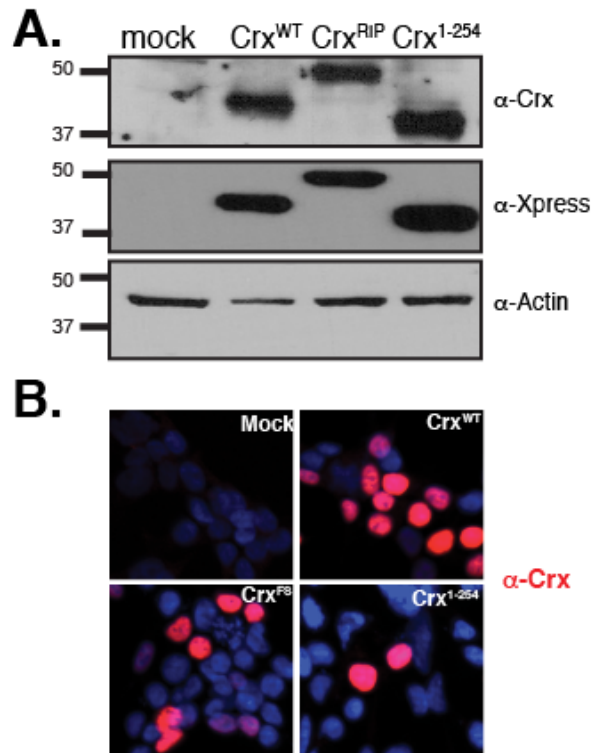

**Figure S2: Crx<sup>RIP</sup> and Crx<sup>1-2254</sup> are produced in transfected cells and localized in the nucleus**

(A) Immunoblot analysis of protein extracts from HEK293T cells transfected with pcDNA4c control vector (Mock) or constructs including Xpress-tagged Crx<sup>WT</sup>, Crx<sup>RIP</sup>, or Crx<sup>1-254</sup>. The blots were probed with anti-Xpress or anti-Crx antibody. Anti-actin antibody was used as loading control. (B) Immunocytochemistry of HEK293T cells with anti-Crx antibody (*red*). Nuclei were counter-stained with DAPI (*blue*). The following constructs were used: empty pcDNA4c (mock), Crx<sup>WT</sup>, Crx<sup>RIP</sup>, or Crx<sup>1-254</sup>.

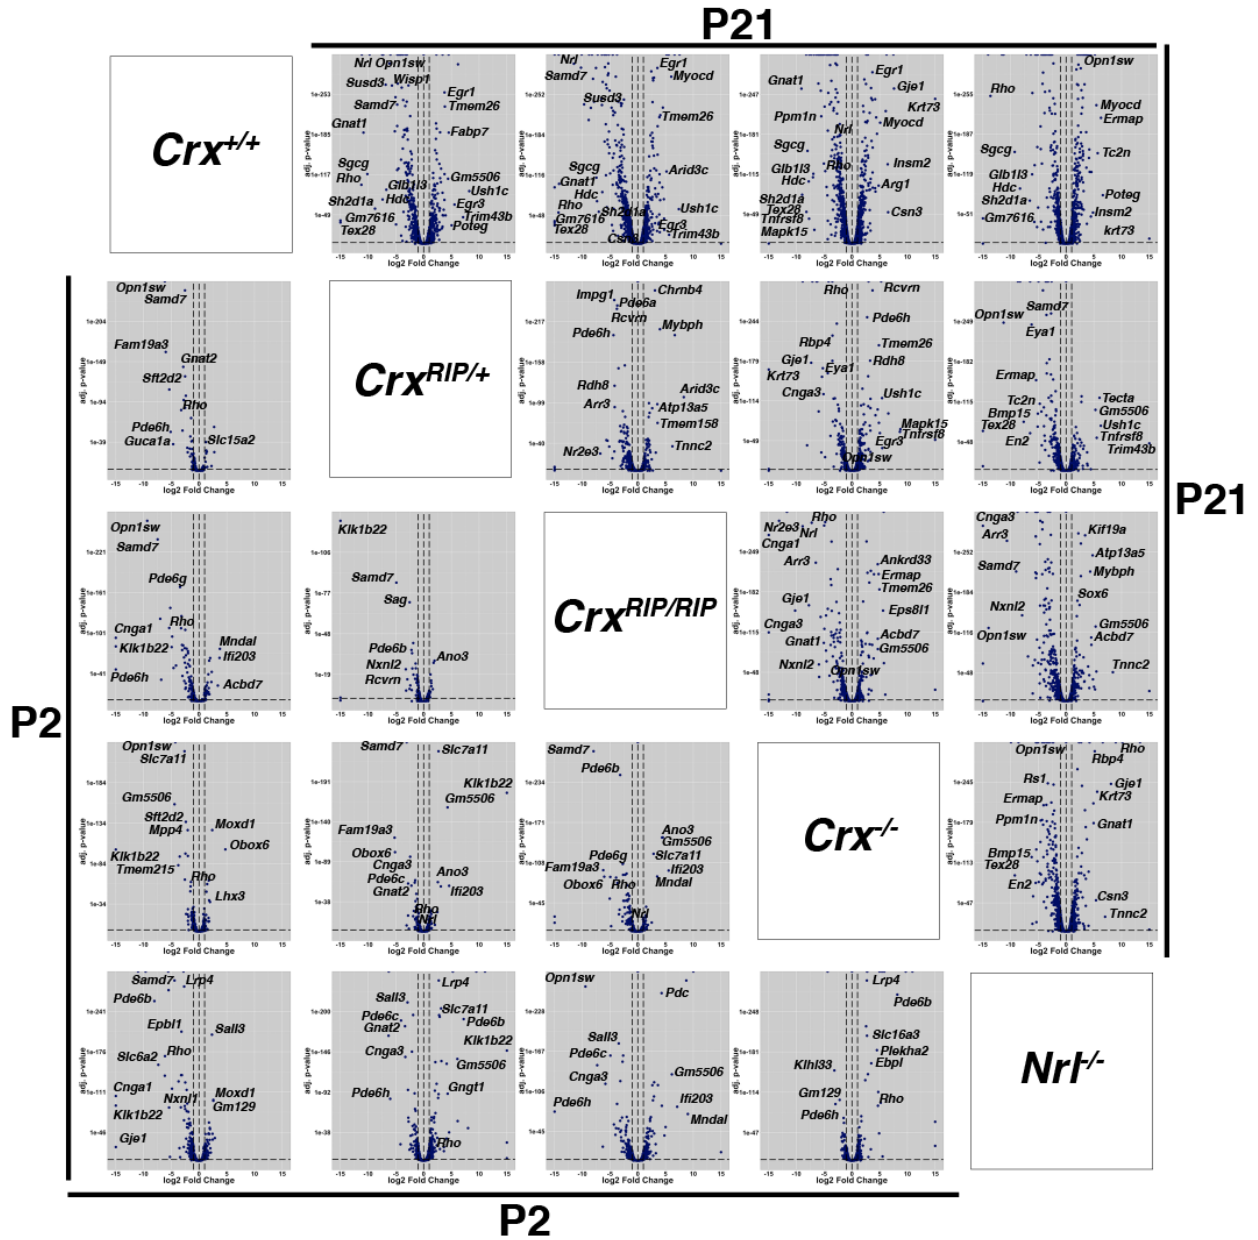

**Figure S3: Volcano plots of genes differentially expressed between WT and Crx mutant retina at P2 and P21.**

Volcano plots represent the FC and significance correlation (adjusted p-value (APV)) between  $Crx^{+/+}$ ,  $Crx^{RIP/+}$ ,  $Crx^{RIP/RIP}$ ,  $Crx^{-/-}$ , and  $Nrl^{-/-}$  retina at two different stages of development – P2 (peak of rod birth) and P21 (mature rods). Dashed lines represent the threshold for  $FC \geq 2$  and  $APV \leq 0.05$ .

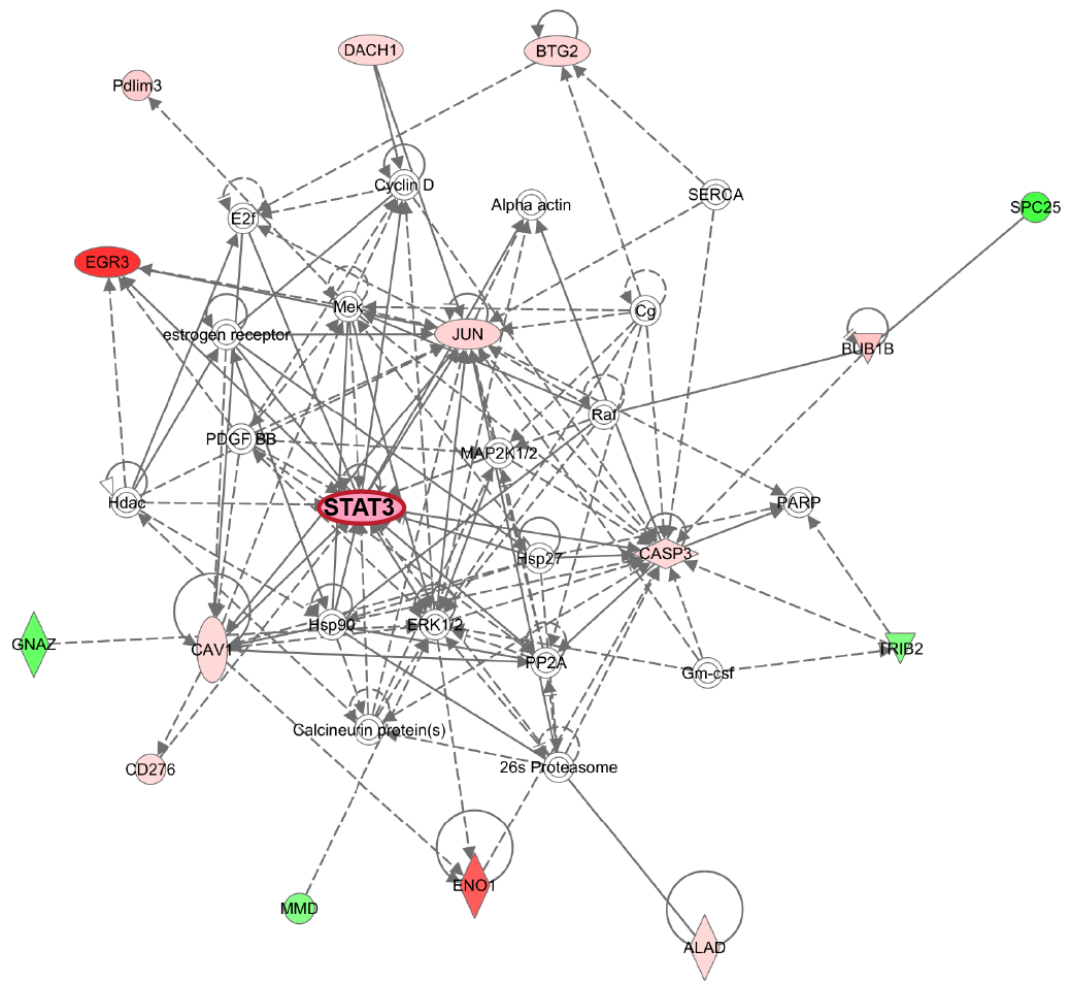

**Figure S4: A cluster of genes showing differential expression only between  $Crx^{RIP/+}$  and  $Crx^{+/+}$  retina at P21 belongs to cell death and survival network involving STAT3 as a central node.**

Network reconstruction was done using 69 genes differentially expressed between P21  $Crx^{RIP/+}$  and  $Crx^{+/+}$  retina. The expression of these genes was unchanged between  $Crx^{-/-}$  or  $Nrl^{-/-}$  and  $Crx^{+/+}$  retina. Up-regulation of the gene of interest between  $Crx^{RIP/+}$  and  $Crx^{+/+}$  mouse retina is indicated by red and down-regulation by green.

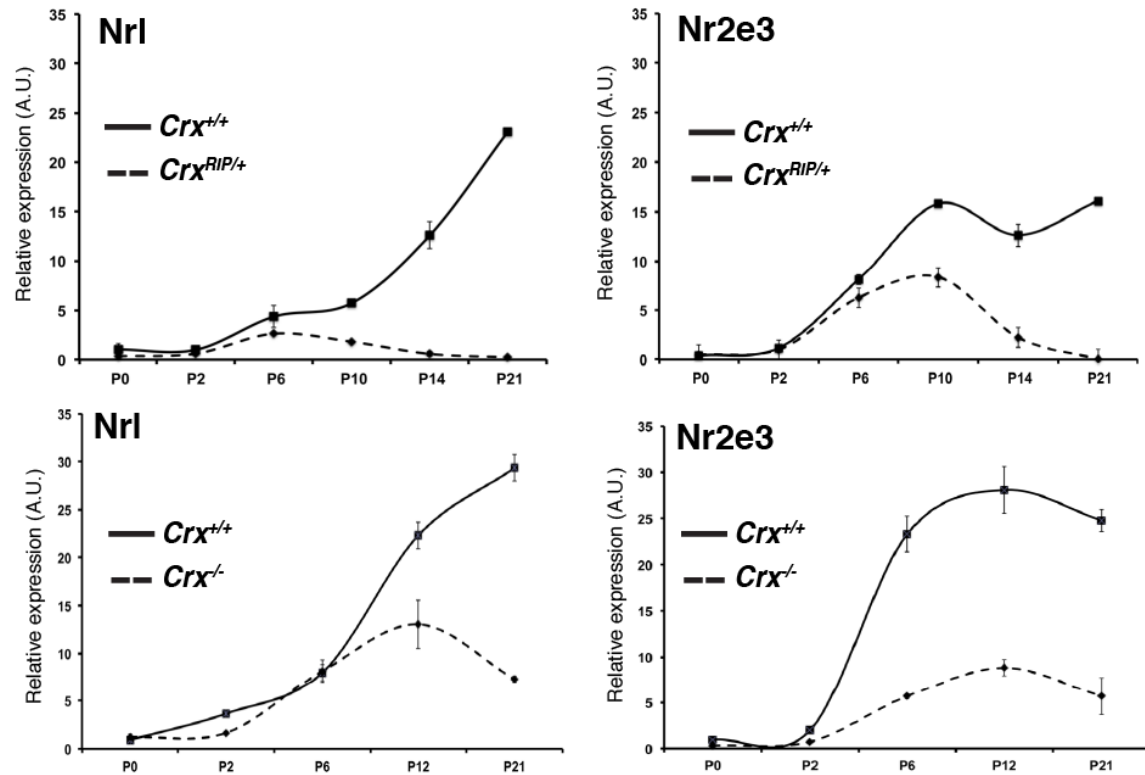

**Figure S5: *Nrl* expression rapidly declines in *Crx*<sup>Rip</sup> mutant retina.**

Differential expression analysis by qPCR of *Nrl* and *Nr2e3* expression in *Crx*<sup>RIP/+</sup> (top panel) and *Crx*<sup>-/-</sup> retina (bottom panel) compared to littermate controls at P0 and P21. All values are expressed as mean  $\pm$  SEM from 3 biological replicates and compared to mRNA expression at P0. The data was normalized against the average of two housekeeping genes: *Act $\beta$*  and *Hprt*. Solid lines, *Crx*<sup>+/+</sup>; dashed lines, *Crx*<sup>RIP/+</sup> or *Crx*<sup>-/-</sup>.

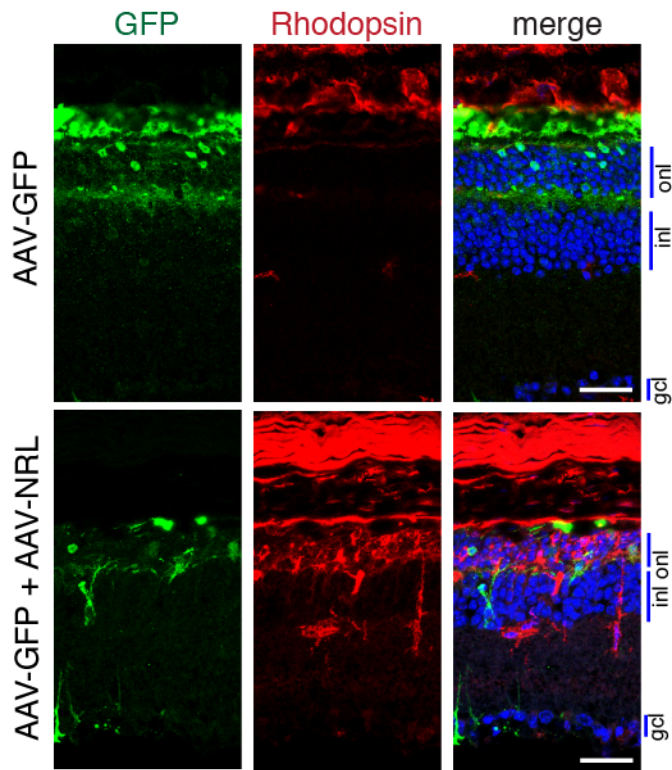

**Figure S6: Expression of *Nrl* using AAV in adult  $Crx^{Rip/+}$  mutant restores Rho expression.**

Immunolabeling analysis of Rho (*red*) in 4-month old  $Crx^{Rip/+}$  mice after injection of AAV GFP as control or AAV-GFP and AAV-NRL in 2 month-old animals. The infected cells are visualized with GFP (*green*). *onl*, outer nuclear layer; *inl*, inner nuclear layer; *gcl*, ganglion cell layer. Scale bar, 40  $\mu$ m.

| Gene Symbol          | Entrez Gene Name                                                | P2                        |                             |                               |                           |                           | P21                       |                             |                               |                           |                           |
|----------------------|-----------------------------------------------------------------|---------------------------|-----------------------------|-------------------------------|---------------------------|---------------------------|---------------------------|-----------------------------|-------------------------------|---------------------------|---------------------------|
|                      |                                                                 | <i>Crx</i> <sup>+/+</sup> | <i>Crx</i> <sup>RIP/+</sup> | <i>Crx</i> <sup>RIP/RIP</sup> | <i>Crx</i> <sup>-/-</sup> | <i>Nrl</i> <sup>-/-</sup> | <i>Crx</i> <sup>+/+</sup> | <i>Crx</i> <sup>RIP/+</sup> | <i>Crx</i> <sup>RIP/RIP</sup> | <i>Crx</i> <sup>-/-</sup> | <i>Nrl</i> <sup>-/-</sup> |
| Transcription Factor |                                                                 |                           |                             |                               |                           |                           |                           |                             |                               |                           |                           |
| <i>Thrb</i>          | thyroid hormone receptor beta                                   | 6                         | 4                           | 2                             | 4                         | 4                         | 14                        | 13                          | 11                            | 12                        | 18                        |
| <i>Rxrg</i>          | retinoid X receptor gamma                                       | 9                         | 5                           | 3                             | 7                         | 5                         | 3                         | 17                          | 7                             | 32                        | 19                        |
| <i>Crx</i>           | cone-rod homeobox containing gene                               | 204                       | 211                         | 167                           | 112                       | 153                       | 347                       | 293                         | 197                           | 170                       | 321                       |
| <i>Neurod1</i>       | neurogenic differentiation 1                                    | 196                       | 211                         | 201                           | 180                       | 114                       | 153                       | 231                         | 212                           | 234                       | 166                       |
| <i>Otx2</i>          | orthodenticle homolog 2 (Drosophila)                            | 329                       | 396                         | 460                           | 441                       | 259                       | 81                        | 153                         | 276                           | 199                       | 117                       |
| <i>Neurod4</i>       | neurogenic differentiation 4                                    | 205                       | 240                         | 253                           | 219                       | 180                       | 51                        | 76                          | 154                           | 107                       | 72                        |
| <i>Pias3</i>         | protein inhibitor of activated STAT 3                           | 32                        | 26                          | 19                            | 27                        | 28                        | 34                        | 23                          | 13                            | 21                        | 31                        |
| <i>Rorb</i>          | RAR-related orphan receptor beta                                | 55                        | 54                          | 63                            | 61                        | 56                        | 30                        | 13                          | 17                            | 24                        | 13                        |
| <i>Rora</i>          | RAR-related orphan receptor alpha                               | 7                         | 7                           | 7                             | 7                         | 7                         | 24                        | 29                          | 25                            | 20                        | 27                        |
| <i>Rxra</i>          | retinoid X receptor alpha; similar to retinoid X receptor-alpha | 13                        | 10                          | 11                            | 10                        | 10                        | 9                         | 6                           | 4                             | 5                         | 6                         |
| <i>Neurod2</i>       | neurogenic differentiation 2                                    | 3                         | 3                           | 3                             | 3                         | 2                         | 3                         | 3                           | 3                             | 3                         | 2                         |
| <i>Rorc</i>          | RAR-related orphan receptor gamma                               | 3                         | 2                           | 3                             | 4                         | 2                         | 1                         | 2                           | 3                             | 4                         | 1                         |
| <i>Neurog2</i>       | neurogenin 2                                                    | 14                        | 13                          | 14                            | 11                        | 8                         | 1                         | 1                           | 1                             | 1                         | 1                         |
| <i>Nrl</i>           | neural retina leucine zipper gene                               | 75                        | 68                          | 40                            | 77                        | 0                         | 447                       | 1                           | 0                             | 85                        | 0                         |
| <i>Nr2e3</i>         | nuclear receptor subfamily 2, group E, member 3                 | 132                       | 137                         | 66                            | 123                       | 0                         | 211                       | 1                           | 0                             | 114                       | 0                         |
| <i>Esrrb</i>         | estrogen related receptor, beta                                 | 1                         | 1                           | 1                             | 1                         | 1                         | 83                        | 2                           | 0                             | 6                         | 2                         |
| <i>Mef2c</i>         | myocyte enhancer factor 2C                                      | 0                         | 0                           | 0                             | 0                         | 0                         | 17                        | 1                           | 1                             | 1                         | 1                         |
| Visual transduction  |                                                                 |                           |                             |                               |                           |                           |                           |                             |                               |                           |                           |
| <i>Opn1sw</i>        | opsin 1, short-wave-sensitive                                   | 42                        | 1                           | 0                             | 2                         | 40                        | 153                       | 1                           | 0                             | 3                         | 2400                      |
| <i>Gnb3</i>          | guanine nucleotide binding protein, beta 3                      | 104                       | 39                          | 19                            | 116                       | 147                       | 121                       | 257                         | 126                           | 338                       | 728                       |
| <i>Arr3</i>          | arrestin 3, retinal                                             | 1                         | 0                           | 0                             | 0                         | 0                         | 120                       | 9                           | 1                             | 44                        | 693                       |
| <i>Opn1mw</i>        | opsin 1 (cone pigments), medium-wave-sensitive                  | 0                         | 0                           | 0                             | 0                         | 0                         | 101                       | 1                           | 1                             | 1                         | 255                       |
| <i>Pde6h</i>         | phosphodiesterase 6H, cGMP-specific, cone, gamma                | 8                         | 0                           | 0                             | 2                         | 13                        | 82                        | 94                          | 5                             | 14                        | 562                       |
| <i>Gnat2</i>         | guanine nucleotide binding protein, alpha transducing 2         | 11                        | 2                           | 1                             | 7                         | 14                        | 76                        | 160                         | 91                            | 127                       | 785                       |
| <i>Pde6c</i>         | phosphodiesterase 6C, cGMP specific, cone, alpha                | 2                         | 1                           | 0                             | 4                         | 8                         | 32                        | 98                          | 60                            | 45                        | 427                       |
| <i>Cngb3</i>         | cyclic nucleotide gated channel beta 3                          | 7                         | 3                           | 2                             | 7                         | 6                         | 5                         | 16                          | 26                            | 13                        | 92                        |
| <i>Cnga3</i>         | cyclic nucleotide gated channel alpha 3                         | 3                         | 1                           | 0                             | 3                         | 5                         | 4                         | 0                           | 0                             | 6                         | 50                        |
| <i>Prph2</i>         | peripherin 2                                                    | 50                        | 31                          | 8                             | 34                        | 14                        | 1519                      | 334                         | 178                           | 276                       | 350                       |
| <i>Pdc</i>           | phosducin                                                       | 143                       | 121                         | 62                            | 178                       | 3                         | 1295                      | 228                         | 196                           | 715                       | 538                       |
| <i>Rbp3</i>          | retinol binding protein 3, interstitial                         | 149                       | 128                         | 106                           | 138                       | 101                       | 758                       | 832                         | 525                           | 760                       | 981                       |
| <i>Rcvrn</i>         | recoverin                                                       | 7                         | 2                           | 0                             | 3                         | 5                         | 526                       | 96                          | 7                             | 7                         | 246                       |
| <i>Guca1a</i>        | guanylate cyclase activator 1a                                  | 4                         | 0                           | 0                             | 1                         | 2                         | 383                       | 127                         | 58                            | 116                       | 446                       |
| <i>Rs1</i>           | retinoschisis (X-linked, juvenile) 1                            | 2                         | 0                           | 0                             | 0                         | 0                         | 366                       | 78                          | 37                            | 22                        | 198                       |
| <i>Grk1</i>          | G protein-coupled receptor kinase 1                             | 2                         | 2                           | 1                             | 1                         | 1                         | 295                       | 119                         | 81                            | 99                        | 184                       |
| <i>Gnb5</i>          | guanine nucleotide binding protein , beta 5                     | 19                        | 17                          | 15                            | 17                        | 18                        | 229                       | 130                         | 111                           | 128                       | 194                       |
| <i>Rgs9</i>          | regulator of G-protein signaling 9                              | 11                        | 7                           | 6                             | 13                        | 12                        | 101                       | 46                          | 38                            | 81                        | 83                        |
| <i>Gucy2f</i>        | guanylate cyclase 2f                                            | 0                         | 0                           | 0                             | 0                         | 0                         | 45                        | 1                           | 0                             | 1                         | 1                         |
| <i>Rho</i>           | rhodopsin                                                       | 8                         | 1                           | 0                             | 3                         | 0                         | 7683                      | 4                           | 1                             | 68                        | 1                         |
| <i>Gnat1</i>         | guanine nucleotide binding protein, alpha transducing 1         | 2                         | 1                           | 1                             | 1                         | 1                         | 4363                      | 3                           | 0                             | 9                         | 0                         |
| <i>Gnb1</i>          | guanine nucleotide binding protein, beta 1                      | 193                       | 175                         | 154                           | 188                       | 142                       | 1318                      | 67                          | 68                            | 116                       | 59                        |
| <i>Pde6g</i>         | phosphodiesterase 6G, cGMP-specific, rod, gamma                 | 35                        | 12                          | 3                             | 21                        | 27                        | 1296                      | 213                         | 72                            | 99                        | 516                       |
| <i>Rom1</i>          | rod outer segment membrane protein 1                            | 74                        | 66                          | 40                            | 84                        | 12                        | 849                       | 121                         | 82                            | 274                       | 191                       |
| <i>Pde6b</i>         | phosphodiesterase 6B, cGMP, rod receptor, beta polypeptide      | 16                        | 9                           | 2                             | 17                        | 0                         | 539                       | 30                          | 7                             | 177                       | 15                        |
| <i>Guca1b</i>        | guanylate cyclase activator 1B                                  | 1                         | 0                           | 0                             | 0                         | 0                         | 538                       | 36                          | 10                            | 10                        | 50                        |
| <i>Pde6a</i>         | phosphodiesterase 6A, cGMP-specific, rod, alpha                 | 1                         | 0                           | 0                             | 0                         | 0                         | 488                       | 21                          | 2                             | 45                        | 38                        |
| <i>Cnga1</i>         | cyclic nucleotide gated channel alpha 1                         | 5                         | 0                           | 0                             | 1                         | 0                         | 236                       | 0                           | 0                             | 57                        | 0                         |
| <i>Pde6d</i>         | phosphodiesterase 6D, cGMP-specific, rod, delta                 | 29                        | 31                          | 28                            | 27                        | 16                        | 57                        | 68                          | 56                            | 46                        | 69                        |
| <i>Cngb1</i>         | cyclic nucleotide gated channel beta 1                          | 0                         | 0                           | 0                             | 0                         | 0                         | 6                         | 0                           | 0                             | 1                         | 0                         |

**Table S1. A summary of selected expression changes based on RNA-seq analysis of P2 and P21 retina from various mutants compared to WT control.**

Global gene expression profiles were generated from *Crx*<sup>+/+</sup>, *Crx*<sup>RIP/+</sup>, *Crx*<sup>RIP/RIP</sup>, *Crx*<sup>-/-</sup>, and *Nrl*<sup>-/-</sup> retina by RNA-seq. Normalized expression values are shown for transcription factor genes associated with photoreceptor development and genes involved in visual transduction. Dark and light grey areas indicate normalized expression values of rod- and cone-specific genes, respectively.

| <i>Primary Antibodies</i>                 | <i>Type</i>                      | <i>Source</i>                             |
|-------------------------------------------|----------------------------------|-------------------------------------------|
| Nrl                                       | Rabbit polyclonal                | Swain et al., 2001                        |
| Crx, clone H-120                          | Rabbit polyclonal                | Santa Cruz                                |
| Rho4D2                                    | Mouse monoclonal                 | R. Molday                                 |
| Opn1sw                                    | Rabbit polyclonal                | C.M. Craft                                |
| Opn1mw                                    | Rabbit polyclonal                | C.M. Craft                                |
| Cone Arrestin                             | Rabbit polyclonal                | Millipore                                 |
| Recoverin                                 | Rabbit polyclonal                | Millipore                                 |
| Peanut Agglutinin (PNA)                   | Conjugated to<br>Alexa Fluor 568 | Life Technologies                         |
| $\beta$ -Actin                            | Mouse monoclonal                 | Millipore                                 |
| <i>Secondary Antibodies</i>               | <i>Type</i>                      | <i>Source</i>                             |
| Anti-rabbit Alexa 488                     | Goat polyclonal                  | Life Technologies                         |
| Anti-mouse Alexa 568                      | Goat polyclonal                  | Life Technologies                         |
| Anti-rabbit light chain,<br>HRP conjugate | Goat polyclonal                  | Jackson<br>ImmunoResearch<br>Laboratories |
| Anti-Mouse light chain,<br>HRP conjugate  | Goat polyclonal                  | Jackson<br>ImmunoResearch<br>Laboratories |

**Table S2. List of antibodies used for immunoblotting and immunohistochemistry.**

| <b>Gene</b>   | <b>Forward Primer</b>      | <b>Reverse Primer</b>       |
|---------------|----------------------------|-----------------------------|
| <b>Rho</b>    | CGCGAGATATCATACTAACGCTAATC | GCCCCTCTGCAAGCCAAT          |
| <b>Gnat1</b>  | GGACAGGTGAAGCTCAGTCTCCTA   | GGTGCCAAGTCAGCAGTTGA        |
| <b>Gnat2</b>  | GGATGGGTGTCCATAAAGAACCT    | GCCTGGGTCCAGCTTACAGAT       |
| <b>Gnb1</b>   | CAGAGGACAACCTGAAGGAGTTC    | CCAGAAGGTATCTGCTGTCAAACC    |
| <b>Opn1mw</b> | CGATGTCAGCATCCTTTTTTCTG    | GACATCTAATCTTCCAGGCTTCCA    |
| <b>Opn1sw</b> | GCCTGCCCTTCAGACACATC       | GAGCAGAAGGGAAGAAAGAGCTT     |
| <b>Nrl</b>    | ACCGCGCCCAGACAGA           | GTTGTGGTGTTTCAGGACAAGGA     |
| <b>Nr2e3</b>  | CCCGCCAGGCTCACCTA          | ACGACTATGACTCCTCAATGGTTAGAT |
| <b>Rorb</b>   | GCTCACATAATCCACAACAGCTTT   | TGAAGCAGAGCGGTGTCACT        |
| <b>Thrb</b>   | CCCTTTTGAGGTCCCCATCT       | ATACATGCAGGGTGTCTGGAGTAC    |
| <b>MyoD</b>   | TCCAGCAACCCGAACCA          | CAGCAGAGCCTGCAGACCTT        |

**Table S3. List of primers used for ChIP-qPCR.**

## Supplemental experimental procedures

### ***Animals and tissue collection***

Mouse eyeballs were fixed in 4% paraformaldehyde for one hour on ice, incubated in an increasing concentration of PBS/sucrose (10%, 20%, 30%), embedded in Tissue-Tek CRYO-OCT compound (Thermo Fisher Scientific), frozen using cold acetone and sectioned at 10  $\mu$ m. For methacrylate sections, eyeballs were first fixed for 30 min in 2% glutaraldehyde before overnight fixation in 4% paraformaldehyde. After embedding in methacrylate, 5 mm-thick sections were cut and stained with hematoxylin and eosin (H&E). For RNA and protein extraction, the retina was quickly isolated and frozen at -80°C.

### ***Plasmid Constructions and Site-directed mutagenesis***

Mouse wild-type *Crx* (*Crx*<sup>WT</sup>) (900 nucleotides), *Crx*<sup>1-254</sup> (768 nucleotides) or *Crx*<sup>RIP</sup> mutant (1164bp) DNA was amplified by PCR from adult retinal cDNA using a common forward primer, 5'-

AAATTTTGATATCCAATGATGGCATATATGAACCCGGG-3' including a *EcoRV* restriction site and the following reverse primers containing a *XhoI* restriction site:

5'-ATATATCTCGAGCTACAAGATCTGAAACTTCCAG-3' for *Crx*<sup>WT</sup>; 5'-

ATATATCTCGAGCTATGACAAGGAGGTGGGGGACTG-3' for *Crx*<sup>1-254</sup> and 5'-

ATATATCTCGAGTCAGTCATGACCTGTACTGACTG-3' for *Crx*<sup>RIP</sup>. PCR

products were sub-cloned into pcDNA4c His/MaxC vector (Life Technologies)

using *EcoRV* and *XhoI* restriction sites. For *in vivo* electroporation, human

*CRX*<sup>WT</sup>, *CRX*<sup>L237</sup>, *CRX*<sup>G255</sup>, and *CRX*<sup>P263</sup> DNA were amplified by PCR from

human retinal cDNA using the forward primer, 5'-TGGTACCCACCATGATGGCGTATATGAACCCG-3' and the reverse primer 5'-AGCGGCCGCCTAGGACCTGTGAGCTGTC-3'. The PCR products were sub-cloned at *KpnI*-*NotI* sites of Ub-GFP vector after removing GFP cassette (1). In this vector, the ubiquitin (Ub) promoter is transcriptionally active in all retinal cells. The different mutants were generated using QuickChange XL site directed mutagenesis kit (Stratagene). Rho-dsRed and Ub-GFP have been previously described (1).

### ***Electrophoretic mobility shift assays***

The following modifications were made in the previously described method (2): HEK293T cells were transiently transfected with pcDNA4c-Crx<sup>WT</sup>, pcDNA4c-Crx<sup>RIP</sup>, pcDNA4c-Crx<sup>1-254</sup> or with the empty vector pcDNA4c. Nuclear extracts from transfected cells were prepared according to manufacturer instructions (NE-PER, Thermo Scientific). The oligonucleotides were: mouse rhodopsin promoter forward, 5'-ATCTCGCGGATGCTGAATCAGCCTCTGGCTTAGGGAGAGAAGGT-3', mouse rhodopsin promoter reverse, 5'-ACCTTCTCTCCCTAAGCCAGAGGCTGATTCAGCATCCGCGAGAT-3'; mouse S-Opsin promoter forward, 5'-GGTGAGAACTAAGAGATCTCTAATCTGGGACTTTGTCTTTGGGA-3', mouse S-Opsin promoter reverse, 5'-TCCCAAAGACAAAGTCCCAGATTAGAGATCTCTTAGTTCTCACC-3'; mouse

Nrl promoter forward, 5'-

GCTCTAAGAGGCGTTAGGCGATTAGGCTGAAAATGTAGGTCACA-3', mouse

Nrl promoter reverse, 5'-

TGTGACCTACATTTTCAGCCTAATCGCCTAACGCCTCTTAGAGC-3'). All

oligonucleotides contain a CRX binding element (3-5). The nuclear extract (5  $\mu$ g) was first incubated with 1  $\mu$ g of poly (dIdC) and 1  $\mu$ g of salmon sperm DNA at 4°C for 15 min in binding buffer (12 mM HEPES [N-2-hydroxyethylpiperazine-N'-2-ethanesulfonic acid], pH 7.9; 60 mM KCl; 4 mM MgCl<sub>2</sub>; 1 mM EDTA [ethylenediaminetetra acetic acid]; 12% glycerol; 1 mM dithiothreitol; and 0.5 mM phenylmethylsulfonyl fluoride [PMSF]). <sup>32</sup>P-Labeled double-stranded oligonucleotide (30,000 cpm) was added to the reaction and incubated at 4°C for another 20 min. In competition studies, nuclear extracts were pre-incubated with 100-fold excess of unlabeled oligonucleotide for 30 min at 4°C and then incubated with labeled oligonucleotide for an additional 20 min. To examine the presence of Crx in protein-DNA complexes, nuclear extracts were incubated with 1  $\mu$ g of anti-Xpress antibody for 15 min at 4°C, followed by the addition of labeled oligonucleotide and a further incubation for 20 min at 4°C. The reaction mixtures were electrophoresed on 8% polyacrylamide gels at 80 V for 2 h and subjected to autoradiography.

### ***Whole transcriptome sequencing (RNA-seq) and data analysis***

RNA was extracted from 2 independent frozen retina samples each dissected at P2 or P21 from *Crx*<sup>+/+</sup>, *Crx*<sup>RIP/+</sup>, *Crx*<sup>RIP/RIP</sup>, *Crx*<sup>-/-</sup>, and *Nrl*<sup>-/-</sup> mice. Tissue was lysed

with mortar and pestle in 1 ml of Trizol (Life Technologies, Carlsbad, CA), and RNA was isolated according to manufacture's instructions. RNA quality and quantity were assessed using BioAnalyzer 2100 with RNA 6000 Nano Kit (Agilent Technologies, Santa Clara, CA). RNA-seq transcriptome libraries were constructed from 1 µg of total RNA using a modified TruSeq RNA Sample Preparation Kit protocol as described (6). The libraries were validated using DNA 1000 Kit (Agilent) and quantitated by qRT-PCR (7). Each library (10 pM) was loaded into an independent flow-cell lane and single-read cluster generation proceeded according to manufacture's protocols using TruSeq Single-Read Cluster Generation Kit v5 (Illumina). Single read sequence-by-synthesis of 76 base length using TruSeq SBS v5 reagents was carried out on Genetic Analyzer Ilx running SCS2.9 software (Illumina). RNA-seq reads passing chastity filter were analyzed using Genomatix Software Suite (Genomatix Software GmbH, Munich Germany). Sequences were aligned to NCBI mouse reference genome Build 37 on Genomatix Mining Station with Genomatix Mapper 3.5.1. Alignments were annotated on Genomatix Genome Analyzer using EIDorado 08-2011 database, and differential expression analysis was performed using DEseq (8). RefSeq transcripts having a fold change greater than 2.0, an adjusted p-value lower than 0.05, and a normalized expression value greater than 5 were kept for hierarchical clustering.

### ***Real-time PCR***

After digestion with DNaseI (Life technologies) according to the manufacturer's instruction, 1 µg of total RNA was reverse transcribed in presence of oligo-(dT)<sub>20</sub> using Superscript II reagents (Life technologies) as previously described (9). For each qRT-PCR, 2 µl of a tenfold dilution of the cDNA was used, and the reactions were performed in triplicates on 7900HT Genetic Analyzer (Life technologies) as previously described (7). Differential expression analysis was performed using the ddCt method using *Actβ* and *Hprt* as endogenous controls (10).

### ***Luciferase assays***

HEK293 cells were seeded in 24-well plates (5x10<sup>4</sup>/well) and co-transfected with 0.1 µg of bovine *Rho* promoter driving firefly luciferase (pBR130-luc (11)), 0.1 µg of pcDNA4c-Nrl (11), 0.1 µg of pcDNA4c-Nr2e3 (11), and different amount of pcDNA4c-Crx<sup>WT</sup>, pcDNA4c-Crx<sup>RIP</sup> and pcDNA4c-Crx<sup>1-254</sup> construct. In addition, 0.1 µg of *Opn1sw* promoter driving firefly luciferase (5) was co-transfected with 0.1 µg of *CMV-Rorβ* (5) and different amount of pcDNA4c-Crx<sup>WT</sup>, pcDNA4c-Crx<sup>RIP</sup> and pcDNA4c-Crx<sup>1-254</sup> construct. For normalization, 10 ng of *Renilla* reporter pRL-TK (Promega) was also transfected. Empty pcDNA4c was used to adjust the total amount of transfected DNA. After 48 h, cells were harvested and lysed with 100 µl of passive lysis buffer (Promega). Luciferase activities were determined using the Dual-Luciferase reporter assay system (Promega) and measured with Modulus microplate luminometer (Promega). All experiments were performed in triplicates.

## Supplemental References

1. Matsuda, T., and Cepko, C.L. Electroporation and RNA interference in the rodent retina in vivo and in vitro. *Proc Natl Acad Sci U S A* 2004;101:16-22.
2. Hao, H., Tummala, P., Guzman, E., Mali, R.S., Gregorski, J., Swaroop, A., and Mitton, K.P. The transcription factor neural retina leucine zipper (NRL) controls photoreceptor-specific expression of myocyte enhancer factor Mef2c from an alternative promoter. *J Biol Chem*. 2011;286:34893-34902.
3. Chen, S., Wang, Q.L., Nie, Z., Sun, H., Lennon, G., Copeland, N.G., Gilbert, D.J., Jenkins, N.A., and Zack, D.J. Crx, a novel Otx-like paired-homeodomain protein, binds to and transactivates photoreceptor cell-specific genes. *Neuron* 1997;19:1017-1030.
4. Kautzmann, M.A., Kim, D.S., Felder-Schmittbuhl, M.P., and Swaroop, A. Combinatorial regulation of photoreceptor differentiation factor, neural retina leucine zipper gene NRL, revealed by in vivo promoter analysis. *J Biol Chem* 2011;286:28247-28255.
5. Srinivas, M., Ng, L., Liu, H., Jia, L., and Forrest, D. Activation of the blue opsin gene in cone photoreceptor development by retinoid-related orphan receptor beta. *Mol Endocri.* 2006;20:1728-1741.
6. Brooks, M.J., Rajasimha, H.K., and Swaroop, A. Retinal transcriptome profiling by directional next-generation sequencing using 100 ng of total RNA. *Methods Mol Biol.* 2012;884:319-334.
7. Brooks, M.J., Rajasimha, H.K., Roger, J.E., and Swaroop, A. Next-generation sequencing facilitates quantitative analysis of wild-type and Nrl(-/-) retinal transcriptomes. *Mol Vis.* 2011;17:3034-3054.
8. Anders, S., and Huber, W. Differential expression analysis for sequence count data. *Genome Biol.* 2010;11:R106.
9. Roger, J., Goureau, O., Sahel, J.A., and Guillonneau, X. Use of suppression subtractive hybridization to identify genes regulated by ciliary neurotrophic factor in postnatal retinal explants. *Mol Vis* 2007;13:206-219.
10. Vandesompele, J., De Preter, K., Pattyn, F., Poppe, B., Van Roy, N., De Paepe, A., and Speleman, F. Accurate normalization of real-time quantitative RT-PCR data by geometric averaging of multiple internal control genes. *Genome Biol.* 2002;3:RESEARCH0034.
11. Kanda, A., Friedman, J.S., Nishiguchi, K.M., and Swaroop, A. Retinopathy mutations in the bZIP protein NRL alter phosphorylation and transcriptional activity. *Hum Mutat.* 2007;28:589-598.
